# Supplementary material
Source: Springer Nature journal article supplement (https://www.springermedizin.de/resource/supplementary/12916_2012_656_MOESM2_ESM.pdf/9597992)
Supplement: MOESM2 [file 9597992]

| Study or Subgroup     | Drug |      |             | Placebo |      |            | Weight        | Std. Mean Difference<br>IV, Random, 95% CI | Std. Mean Difference<br>IV, Random, 95% CI |
|-----------------------|------|------|-------------|---------|------|------------|---------------|--------------------------------------------|--------------------------------------------|
|                       | Mean | SD   | Total       | Mean    | SD   | Total      |               |                                            |                                            |
| Gengo 1995            | 2.1  | 2.4  | 24          | 4       | 3.5  | 24         | 8.2%          | -0.62 [-1.20, -0.04]                       |                                            |
| Harrison 1994         | 1.6  | 2.2  | 25          | 1.5     | 2    | 25         | 8.7%          | 0.05 [-0.51, 0.60]                         |                                            |
| Hyypa 2003            | 0.34 | 0.79 | 60          | 0.28    | 0.46 | 60         | 13.8%         | 0.09 [-0.27, 0.45]                         |                                            |
| Morales 2006          | 3.6  | 0.98 | 33          | 3.6     | 0.5  | 39         | 10.7%         | 0.00 [-0.46, 0.46]                         |                                            |
| Muldoon 2000          | 3.1  | 4.3  | 98          | 2.3     | 3.3  | 96         | 16.5%         | 0.21 [-0.07, 0.49]                         |                                            |
| Stewart 2000          | 22.6 | 10.1 | 559         | 22.8    | 9.6  | 571        | 22.3%         | -0.02 [-0.14, 0.10]                        |                                            |
| Wardle 1996           | 8    | 3.8  | 334         | 9.5     | 3.5  | 157        | 19.8%         | -0.40 [-0.60, -0.21]                       |                                            |
| <b>Total (95% CI)</b> |      |      | <b>1133</b> |         |      | <b>972</b> | <b>100.0%</b> | <b>-0.08 [-0.29, 0.12]</b>                 |                                            |

Heterogeneity:  $\tau^2 = 0.05$ ;  $\chi^2 = 20.57$ ,  $df = 6$  ( $P = 0.002$ );  $I^2 = 71\%$   
 Test for overall effect:  $Z = 0.81$  ( $P = 0.42$ )

-4      -2      0      2      4  
 Favours experimental      Favours control
